# Supplementary material for: The miR-193a-3p-regulated ING5 gene activates the DNA damage response pathway and inhibits multi-chemoresistance in bladder cancer
Source: PubMed Central journal article supplement (PMC4496349; doi:10.18632/oncotarget.3555), 2015-03-12
Supplement: oncotarget-06-10195-s001.pdf [file oncotarget-06-10195-s001.pdf]

# The miR-193a-3p-regulated ING5 gene activates the DNA damage response pathway and inhibits multi-chemoresistance in bladder cancer

## Supplementary Material

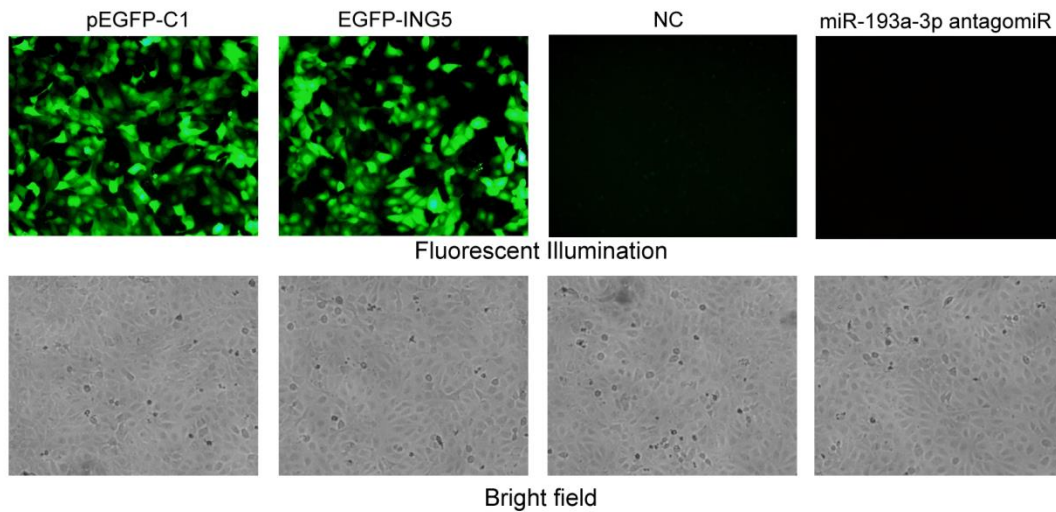

**Supplementary Figure 1:** The ING5 level in miR-193a-3p antagomiR- and overexpression construct-transfected H-bc cells. A representative field of H-bc cells transfected with miR-193a-3p antagomiR and the GFP-tagged ING5 ectopic expression construct is shown. Top panel: the green fluorescent illuminated field. Bottom panel: the bright field. The pEGFP-C1 vector and a nonsense microRNA sequence were used as negative controls.

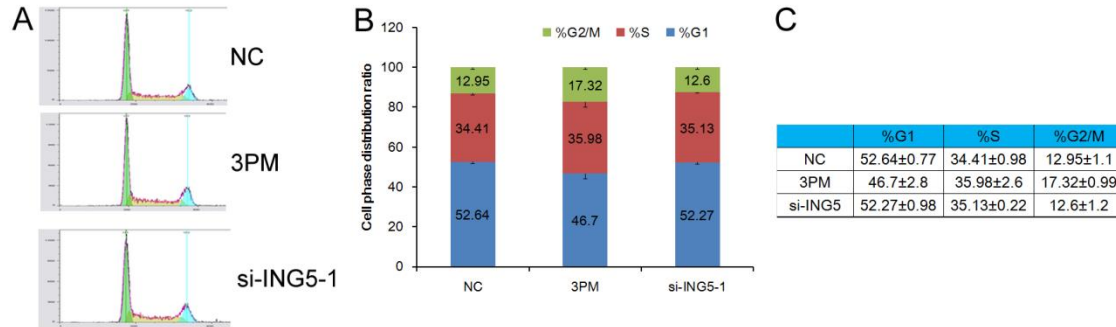

**Supplementary Figure 2:** The effects of the forced reversal of both the miR-193a-3p and ING5 levels on the cell cycle profile of 5637 cells by FACS analysis. The percentages of cells in the G1 (blue), S (brown), and G2/M phases (green) compared with the original (A) is also shown in plot (B) and table (C) formats.

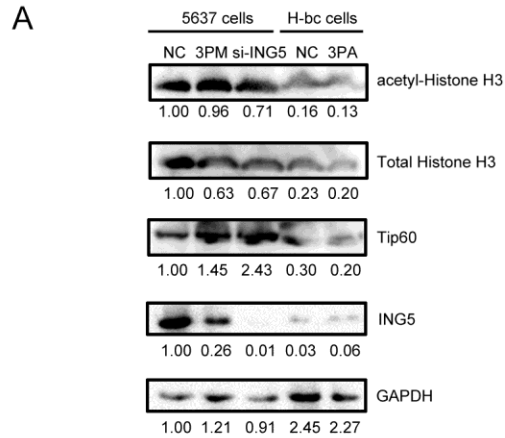

**B**

|                        | 5637 cells |      |         | H-bc cells |      |
|------------------------|------------|------|---------|------------|------|
|                        | NC         | 3PM  | SI-ING5 | NC         | 3PA  |
| Acetyl-H3/<br>total H3 | 1.00       | 1.52 | 1.06    | 0.70       | 0.65 |

  

|                 | 5637 cells |      |         | H-bc cells |      |
|-----------------|------------|------|---------|------------|------|
|                 | NC         | 3PM  | SI-ING5 | NC         | 3PA  |
| Tip60/<br>GAPDH | 1.00       | 1.20 | 2.67    | 0.12       | 0.09 |

**Supplementary Figure 3:** ING5's effects on histone H3 acetylation and Tip60 level. **A**, Levels of acetyl-histone H3, total histone H3, Tip60 and ING5 in miR-193a-3p mimic- and ING5 siRNA-transfected 5637 cells and miR-193a-3p antagomiR-transfected H-bc cells compared with NC-transfected cells as assessed by Western blot. **B**, The ratio of the acetyl-histone H3 level to the total histone H3 level and the relative Tip60 protein level are calculated and summarized in the table.
